# Supplementary material for: Low immunogenicity of mouse induced pluripotent stem cell-derived neural stem/progenitor cells
Source: PubMed Central journal article supplement (PMC5636829; doi:10.1038/s41598-017-13522-w), 2017-10-11
Supplement: 41598_2017_13522_MOESM1_ESM.pdf [file 41598_2017_13522_MOESM1_ESM.pdf]

1 Low immunogenicity of mouse induced pluripotent stem  
2 cell-derived neural stem/progenitor cells

3 Go Itakura<sup>1,2</sup>, Masahiro Ozaki<sup>1,2</sup>, Narihito Nagoshi<sup>2</sup>, Soya Kawabata<sup>1,2</sup>, Yuichiro  
4 Nishiyama<sup>1,2</sup>, Keiko Sugai<sup>1,2</sup>, Tsuyoshi Iida<sup>1,2</sup>, Rei Kashiwagi<sup>1,2</sup>, Toshiki Ookubo<sup>1,2</sup>,  
5 Kaori Yastake<sup>1,2</sup>, Kohei Matsubayashi<sup>1,2</sup>, Jun Kohyama<sup>1</sup>, Akio Iwanami<sup>2</sup>, Morio  
6 Matsumoto<sup>2</sup>, Masaya Nakamura<sup>2\*</sup> and Hideyuki Okano<sup>1\*</sup>

7

8 <sup>1</sup>Department of Physiology, Keio University School of Medicine, 35 Shinanomachi,  
9 Shinjuku, Tokyo 160-8582, Japan

10 <sup>2</sup>Department of Orthopaedic Surgery, Keio University School of Medicine, 35  
11 Shinanomachi, Shinjuku, Tokyo 160-8582, Japan

12 \*Corresponding authors

13 **Contact information:** hidokano@a2.keio.jp (H.O.) and masa@a8.keio.jp (M.N.)

14 **Running title:** Low immunogenicity of mouse iPSC-NSPCs

15 **Key words:** induced pluripotent stem cells (iPSCs), neural stem/progenitor cells  
16 (NSPCs), immune-rejection, syngenic, allogenic.

1 **Supplementary figures**

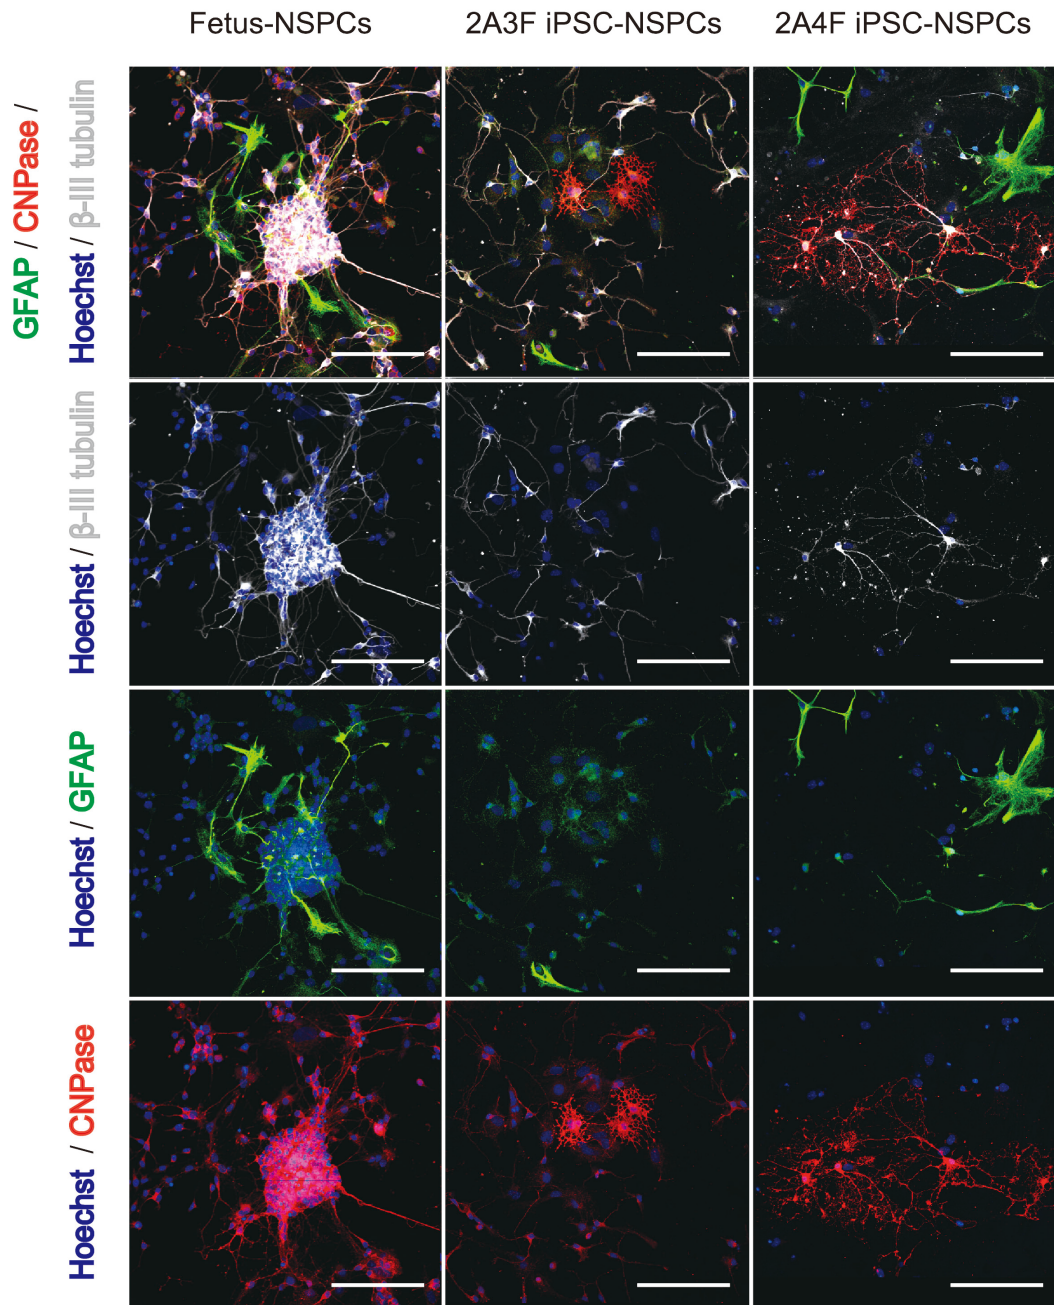

2

3 **Figure S1. High magnification images of terminally differentiated NSPCs in vitro.**

4 Terminally differentiated neurons, astrocytes, oligodendrocytes from fetus-iPSC-NSPCs

- 1 and iPSC-NSPCs were stained.
- 2 iPSC-NSPCs differentiated into neurons, astrocytes and oligodendrocytes similar to the
- 3 fetus-NSPCs. Scale bars = 100  $\mu$ m.

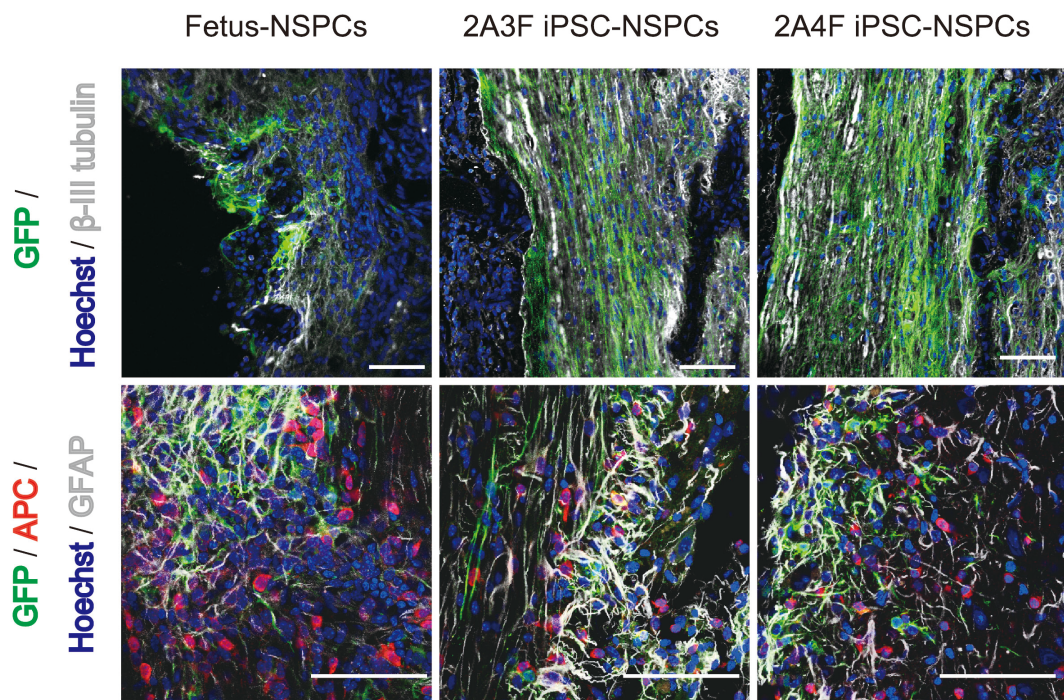

5 **Figure S2. High magnification images of terminally differentiated NSPCs in vivo.**

- 6 Fetus-NSPCs and iPSC-NSPCs differentiated into neurons, astrocytes and
- 7 oligodendrocytes, and integrated with host cells. Scale bars = 100  $\mu$ m.
